# Supplementary material
Source: Springer Nature journal article supplement (https://www.springermedizin.de/resource/supplementary/13012_2011_498_MOESM1_ESM.pdf/9630140)

Phase 1 Phase 2 Phase 3

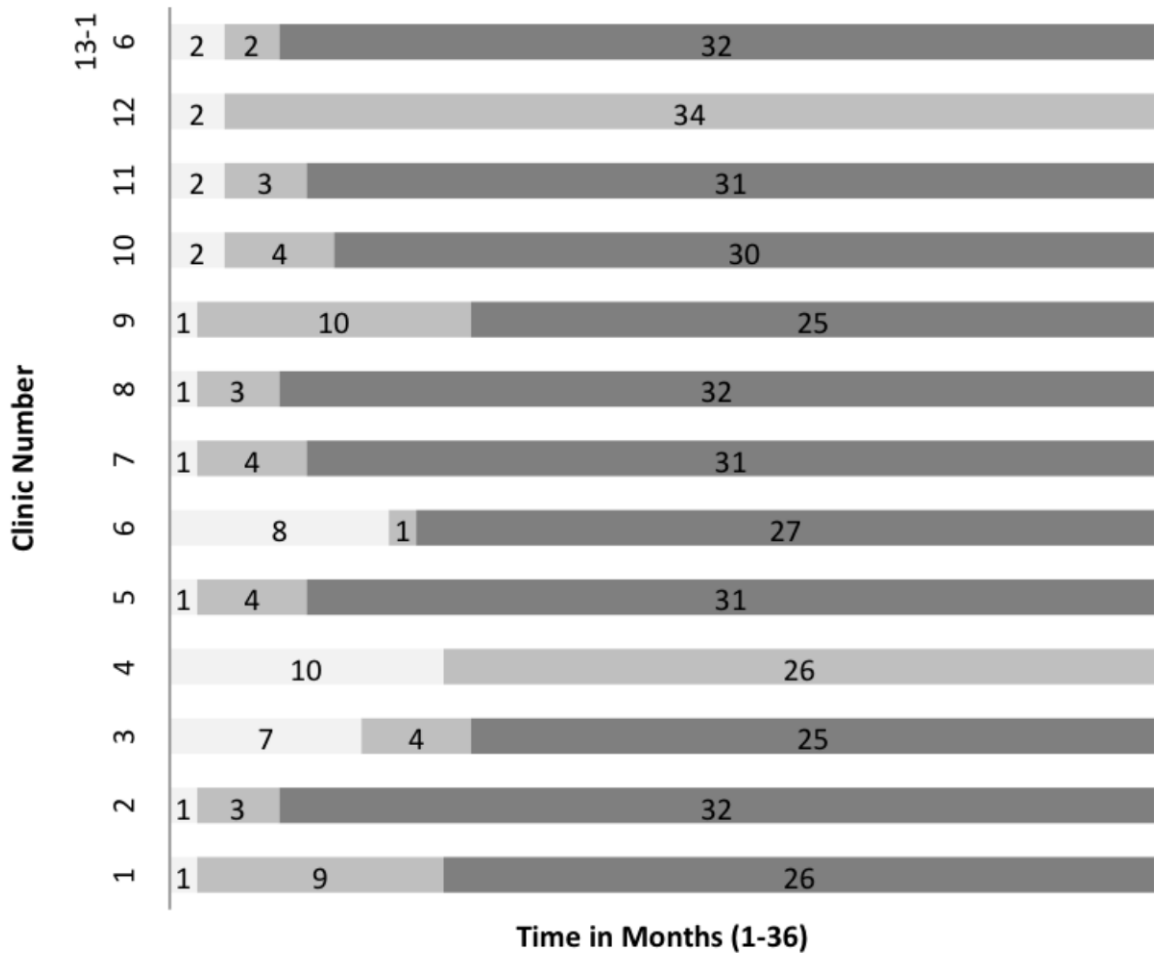

Supplement: MOESM1 [file 9630140]
